# Supplementary material for: Strong metal–support interactions between Ni and ZnO particles and their effect on the methanation performance of Ni/ZnO
Source: Royal Society of Chemistry journal article supplement (doi:10.1039/c7cy01119a), 2017-01-01
Supplement: c7cy01119a1.pdf [file c7cy01119a1.pdf]

Supplementary information:

**Strong metal-support interactions between Ni and ZnO particles and  
their effect on the methanation performance of Ni/ZnO**

Weixing Wang,<sup>a, b, c</sup> Xuekuan Li,<sup>a</sup> Ye Zhang,<sup>a</sup> Rong Zhang,<sup>a</sup> Hui Ge,<sup>a</sup> Jicheng Bi,<sup>\*a</sup> Mingxing Tang<sup>\*a</sup>

<sup>a</sup> *Institute of Coal Chemistry, Chinese Academy of Sciences, Taiyuan 030001, China. E-mail: mxtang@sxicc.ac.cn; bjc@sxicc.ac.cn*

<sup>b</sup> *University of Chinese Academy of Sciences, Beijing 100049, China*

<sup>c</sup> *School of Chemistry & Chemical Technology, Southwest Petroleum University, Chengdu, Sichuan, 650100, China*

\*Correspondence to Mingxing Tang and Jicheng Bi Tel: +86-0351-4046547, Fax: +86-0351-4046547, E-mail: [mxtang@sxicc.ac.cn](mailto:mxtang@sxicc.ac.cn) (M. Tang); [bjc@sxicc.ac.cn](mailto:bjc@sxicc.ac.cn) (J. Bi)

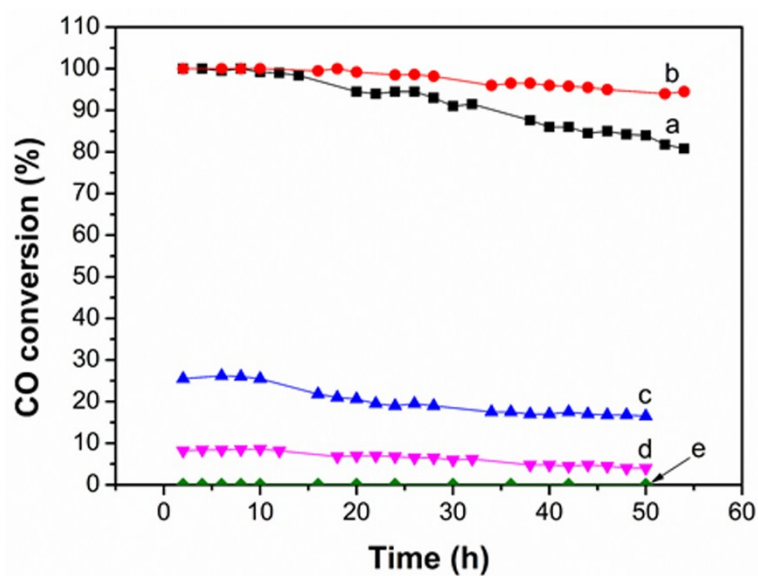

**Figure S. 1.** The stabilities for CO methanation over the Ni/ $\gamma$ - $\text{Al}_2\text{O}_3$  sample reduced at 500 °C (a) and Ni/ZnO samples reduced at 350 °C (b), 400 °C (c), 450 °C (d) and 500 °C (e). Reaction conditions: temperature = 380 °C; pressure = 0.1 MPa; GHSV = 1000 h<sup>-1</sup>.

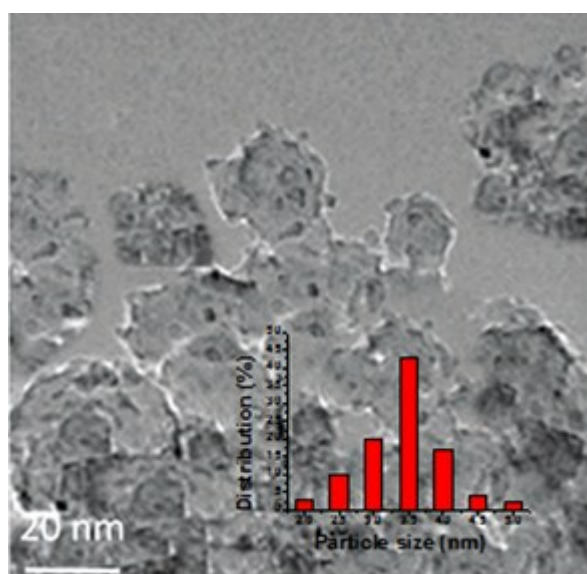

**Figure S.2.** The TEM image of the Ni/ZnO sample reduced at 350 °C after 300 h reaction time. The inset is Ni particles size distribution histogram.

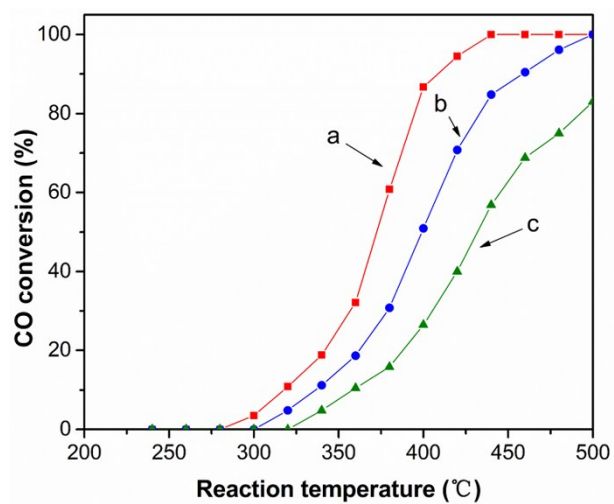

**Figure S.3.** CO conversion over Ni/ZnO samples reduced at 400 °C (a), 450 °C (b) and 500 °C (c) after they were in situ re-oxidized in air flow of 50 mL/min at 200 °C for 2 h and subsequently re-reduced in H<sub>2</sub> flow of 50 mL/min at 350 °C for 3 h.
